# Supplementary material for: Genome-Wide Identification, Characterization, and Stress-Responsive Expression Profiling of Genes Encoding LEA (Late Embryogenesis Abundant) Proteins in Moso Bamboo (Phyllostachys edulis)
Source: PLoS One. 2016 Nov 9;11(11):e0165953. doi: 10.1371/journal.pone.0165953 (PMC5102402; doi:10.1371/journal.pone.0165953)
Supplement: S3 Table — (XLSX) [file pone.0165953.s004.xlsx]

## Sheet: sheet1
S3 Table Homology to the known LEA proteins associated with stress tolerance
Gene	Source organism	Target host	Functions	Homologue in P. edulis	E-value	Reference
TaLEA2	Wheat	Yeast	improved salt and freezing stress tolerance	PH01001328G0610	9e-13	Yu et al.2005
TaLEA3	Wheat	Yeast	improved salt and freezing stress tolerance	PH01000468G0630	8e-20	Yu et al.2005
LEA14-A	Cotton	Cotton	response to diverse stresses	PH01001932G0350	6e-58	Galau et al. 1993
				PH01001601G0380	2e-57
PcC27-45	Craterostigma plantagineum	Craterostigma plantagineum	response to diverse stresses	PH01001932G0350	2e-45	Piatkowski et al. 1990
				PH01001601G0380	2e-45
D95-4	Soybean	Soybean	drought-induced	PH01001932G0350	3e-51	Maitra and Cushman 1994
				PH01001601G0380	3e-54
ER5	Tomato	Tobacco	tolerance to dehydration and NaCl	PH01001932G0350	2e-47	Kim et al. 2005
				PH01001601G0380	2e-47
LEA14	Arabidopsis	Arabidopsis	regulated by high light-stress	PH01001932G0350	1e-48	Matsui 2003
				PH01001601G0380	1e-49
IbLEA14	Sweetpotato	sweetpotato	increased tolerance to drought and salt stress	PH01001932G0350	9e-48	Park et al. 2011
				PH01001601G0380	1e-45
OsLEA5	rice	Escherichia coli	resistance against diverse abiotic stresses	PH01001932G0350	2e-54	He et al. 2002
				PH01001601G0380	9e-79
PM2	soybean	soybean	tolerance to salt stress	PH01000468G0630	8e-31	Liu and Zheng 2005
ZmLEA3	maize	tobacco and yeast	tolerance to osmotic and oxidative stresses	PH01000468G0630	5e-14	Yang et al. 2013
				PH01001328G0610	6e-14
SiLEA14	Foxtail millet	E. coli, Arabisopsis, foxtail millet	improvtolerance to salt and osmotic and drought stress	PH01001932G0350	9e-52	Wang et al. 2014
				PH01001601G0380	3e-77
HVA1	barley	wheat	drought tolerance	PH01000468G0630	1e-21	Sivamani et al. 2000
Reference:
Galau GA, Wang HY, Hughes DW. Cotton Lea5 and Lea74 encode atypical Late Embryogenesis-Abundant proteins. Plant Physiol 1993, 101:695–696.
He S, Tan L, Hu Z, Chen G, Wang G, Hu T: Molecular characterization and functional analysis by heterologous expression in E. coli under diverse abiotic stresses for OsLEA5, the atypical hydrophobic LEA protein from Oryza sativa L. Mol Genet Genomics 2012, 287:39–54.
Kim HS, Lee JH, Kim JJ, Kim CH, Jun SS, Hong YN: Molecular and functional characterization of CaLEA6, the gene for a hydrophobic LEA protein from Capsicum annuum. Gene 2005, 344:115–23.
Liu Y and Zheng YZ. PM2, a group 3 LEA protein from soybean, and its 22-mer repeating region confer salt tolerance in Escherichia coli. Biochem. Biophys. Res Commun 2005,331: 325–332.
Maitra N, Cushman JC: Isolation and characterization of a drought-induced soybean cDNA encoding a D95 family late-embryogenesis-abundant protein. Plant Physiol 1994, 106:805–806
Matsui M: Identification of Arabidopsis genes regulated by high light-stress using cDNA microarray. Photochem Photobiol 2003, 77:226–233.
Park SC, Kim YH, Jeong JC, Kim CY, Lee HS, Bang JW, Kwak SS: Sweetpotato late embryogenesis abundant 14 (IbLEA14) gene influences lignifications and increases osmotic- and salt stress-tolerance of transgenic calli. Planta 2011, 233:621–634
Piatkowski D, Schneider K, Salamini F, Bartels D: Characterization of five abscisic acid-responsive cDNA clones isolated from the desiccation-tolerant plant Craterostigma plantagineum and their relationship to other water-stress genes. Plant Physiol 1990, 94:1682–1688
Sivamani E, Bahieldin A, Wraith JM, Al-Niemi T, Dyer WE, Ho TD et al. Improved biomass productivity and water use efﬁciency under water deﬁcit conditions in transgenic wheat constitutively expressing the barley HVA1 gene. Plant Sci 2000, 155: 1–9
Wang M, Li P, Li C, Pan Y, Jiang X, Zhu D, Zhao Q and Yu J. SiLEA14, a novel atypical LEA protein, confers abiotic stress resistance in foxtail millet. BMC Plant Biology 2014, 14:290
Yang Liu, Li Wang, Xin Xing, Liping Sun, Jiaowen Pan, Xiangpei Kong, Maoying Zhang and Dequan Li. ZmLEA3, a Multifunctional Group 3 LEA Protein from Maize (Zea mays L.), is Involved in Biotic and Abiotic Stresses. Plant Cell Physiol 2013, 54(6): 944–959
Yu JN, Zhang JS, Shan L and Chen SY. Two new group 3 LEA genes of wheat and their functional analysis in yeast. J Integr Plant Biol 2005, 47: 1372–1381.
